# Supplementary material for: Compensatory evolution in NusG improves fitness of drug-resistant M. tuberculosis
Source: PubMed Central journal article supplement (PMC10990936; doi:10.1038/s41586-024-07206-5), 2024-03-20

# Supplemental Figure 1

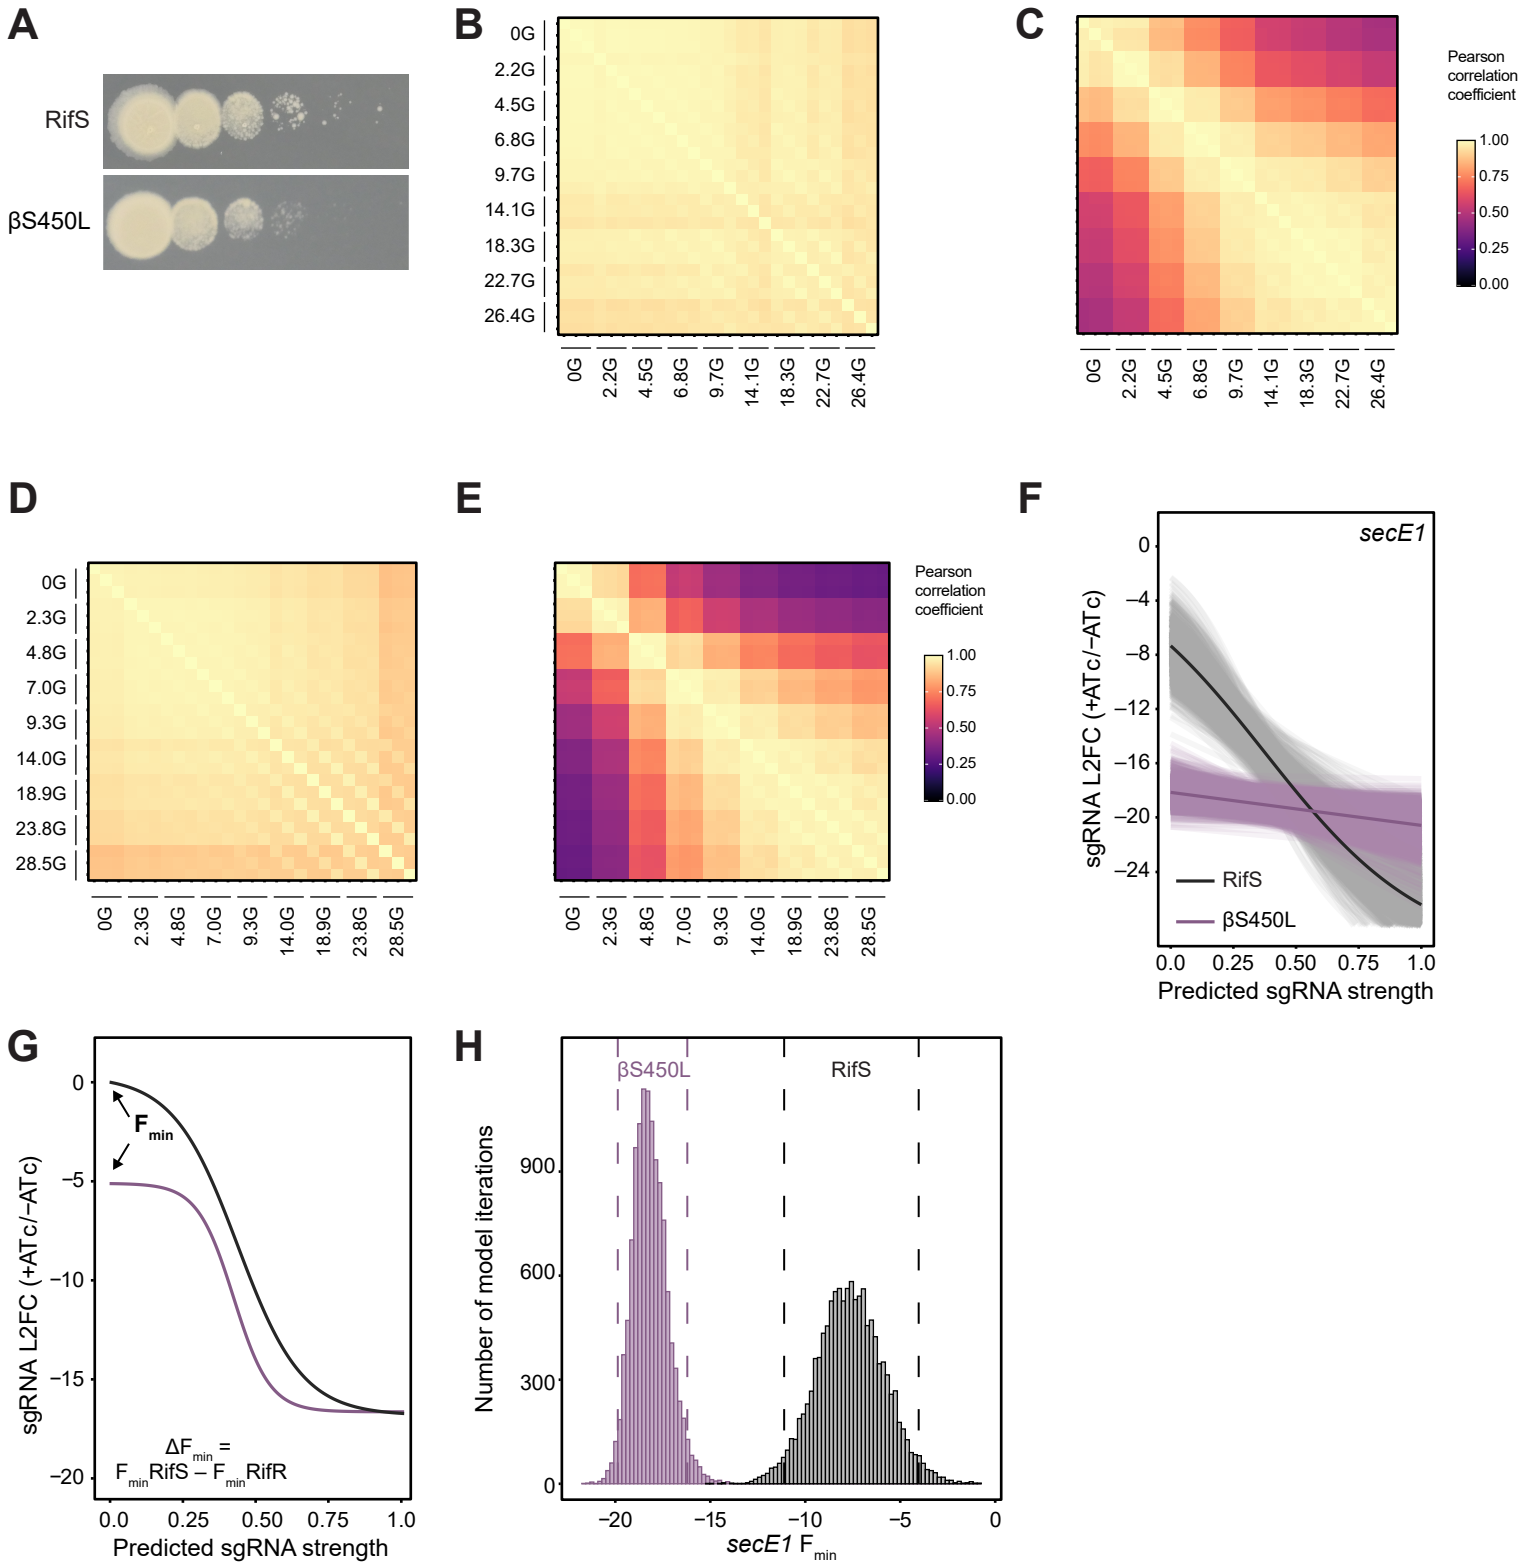

# Supplemental Figure 2

## A

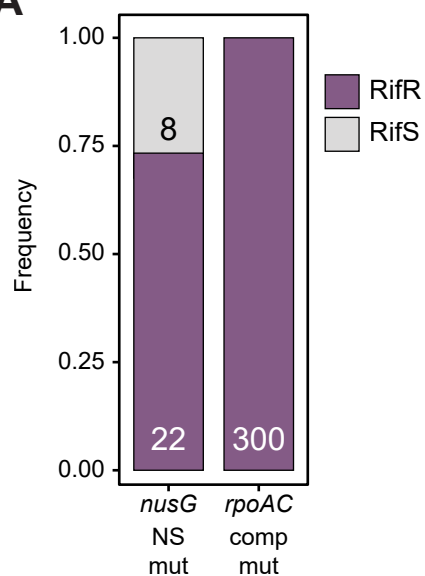

## B

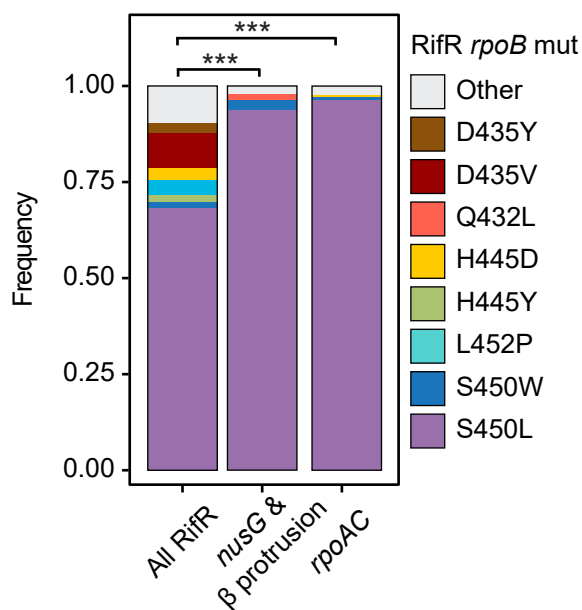

## C

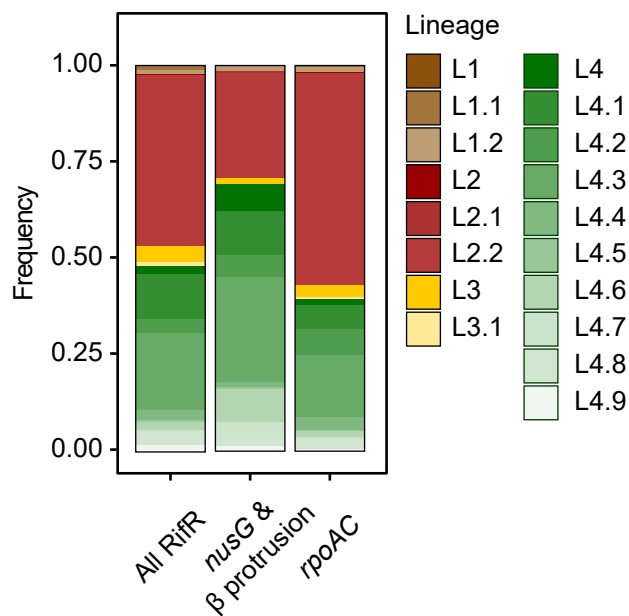

## D

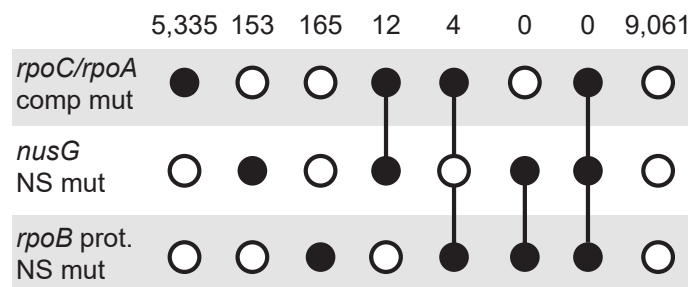

## E

|            |   |   |   |   |   |   |   |
|------------|---|---|---|---|---|---|---|
| WT Core    |   |   | X | X | X | X | X |
| NT-DNA     | X |   | X | X | X | X | X |
| T-DNA      |   | X | X | X | X | X | X |
| WT NusG    |   |   |   | X |   |   |   |
| N65H NusG  |   |   |   |   | X |   |   |
| R124L NusG |   |   |   |   |   | X |   |
| N125S NusG |   |   |   |   |   |   | X |

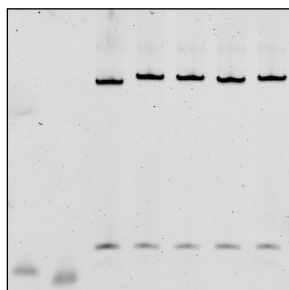

## F

|             |   |   |   |   |   |   |   |
|-------------|---|---|---|---|---|---|---|
| βS450L Core |   |   | X | X | X | X | X |
| NT-DNA      | X |   | X | X | X | X | X |
| T-DNA       |   | X | X | X | X | X | X |
| WT NusG     |   |   |   | X |   |   |   |
| N65H NusG   |   |   |   |   | X |   |   |
| R124L NusG  |   |   |   |   |   | X |   |
| N125S NusG  |   |   |   |   |   |   | X |

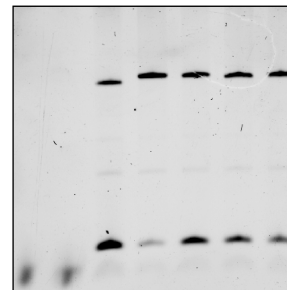

# Supplemental Figure 3

**A**

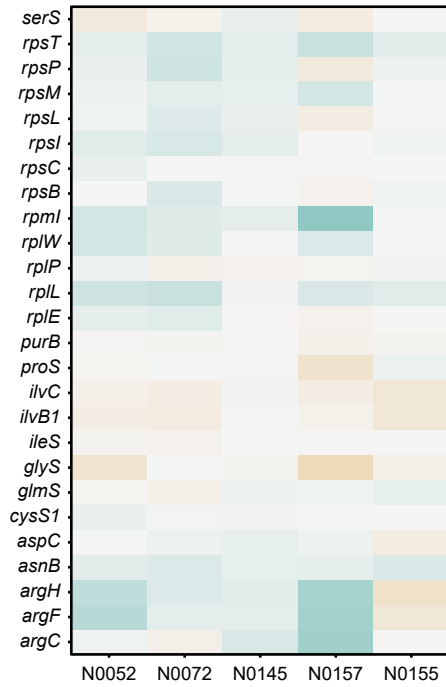

**B**

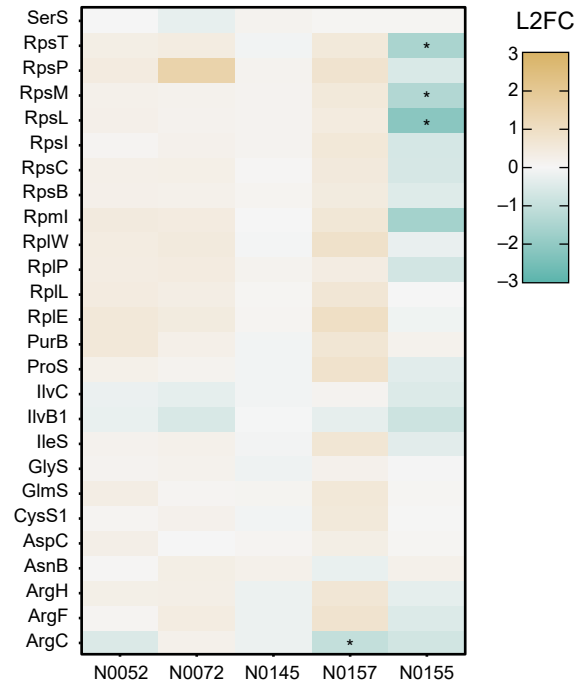

**C**

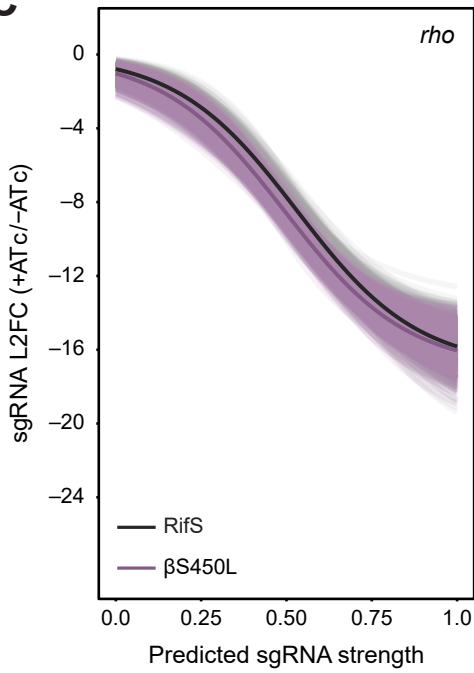

**D**

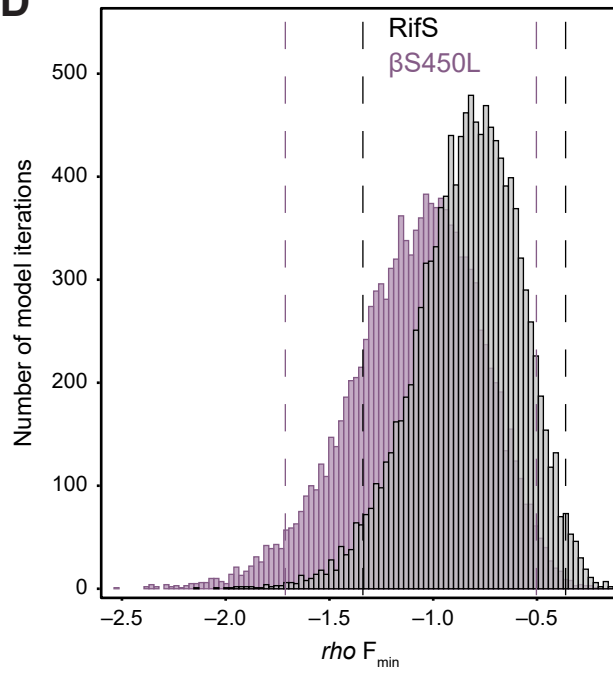

# Supplemental Figure 4

## A WT RNAP

|            |   |   |   |   |   |   |   |   |
|------------|---|---|---|---|---|---|---|---|
| WT Core    |   |   | X | X | X | X | X | X |
| NT-DNA     | X |   | X | X | X | X | X | X |
| T-DNA      |   | X | X | X | X | X | X | X |
| WT NusG    |   |   | X |   |   |   |   |   |
| N65H NusG  |   |   |   | X |   |   |   |   |
| R124L NusG |   |   |   |   | X |   |   |   |
| N125S NusG |   |   |   |   |   |   | X |   |

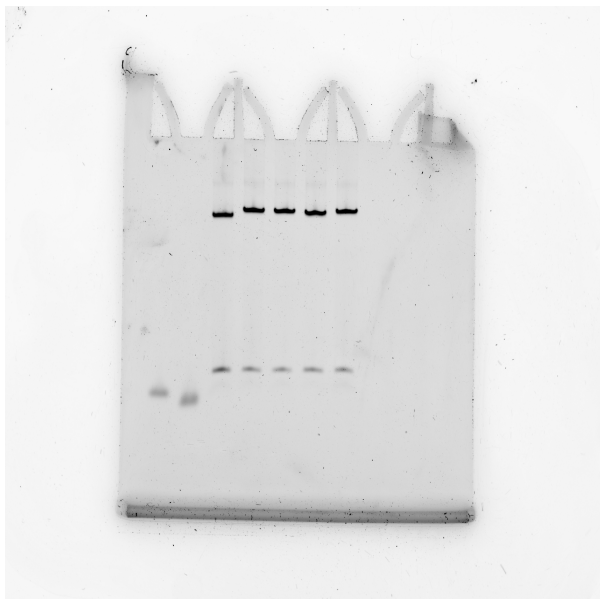

## B $\beta$ S450L RNAP

|                    |   |   |   |   |   |   |   |
|--------------------|---|---|---|---|---|---|---|
| $\beta$ S450L Core |   |   | X | X | X | X | X |
| NT-DNA             | X |   | X | X | X | X | X |
| T-DNA              |   | X | X | X | X | X | X |
| WT NusG            |   |   | X |   |   |   |   |
| N65H NusG          |   |   |   | X |   |   |   |
| R124L NusG         |   |   |   |   | X |   |   |
| N125S NusG         |   |   |   |   |   | X |   |

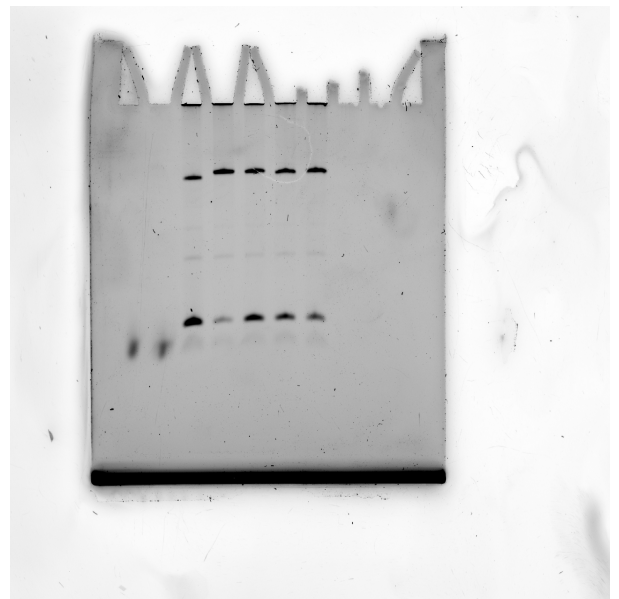

Supplement: 41586_2024_7206_MOESM3_ESM.pdf [file 41586_2024_7206_MOESM3_ESM.pdf]
